# Supplementary material for: Theoretical Study of the Effect of Instrument Parameters on the Flow Field of Air-Flow Impacting Based Mechanochemical Synthesis
Source: Hindawi journal article supplement (doi:10.1155/2018/3061517), 2018-01-01
Supplement: f1 [file 3061517.f1.docx]

**Supporting information**

**Theoretical study of the effect of instrument parameters on the flow field of air-flow impacting based mechanochemical synthesis**

Yang Tao*, Jun Lin, Zhao Zhang, Qiuting Guo, Jin Zuo, Bo Lu

High Speed Aerodynamics Institute, China Aerodynamics Research and Development Center, Mianyang, 621000, China

*Corresponding author: Dr. Yang Tao, Email: 50323222@qq.com.


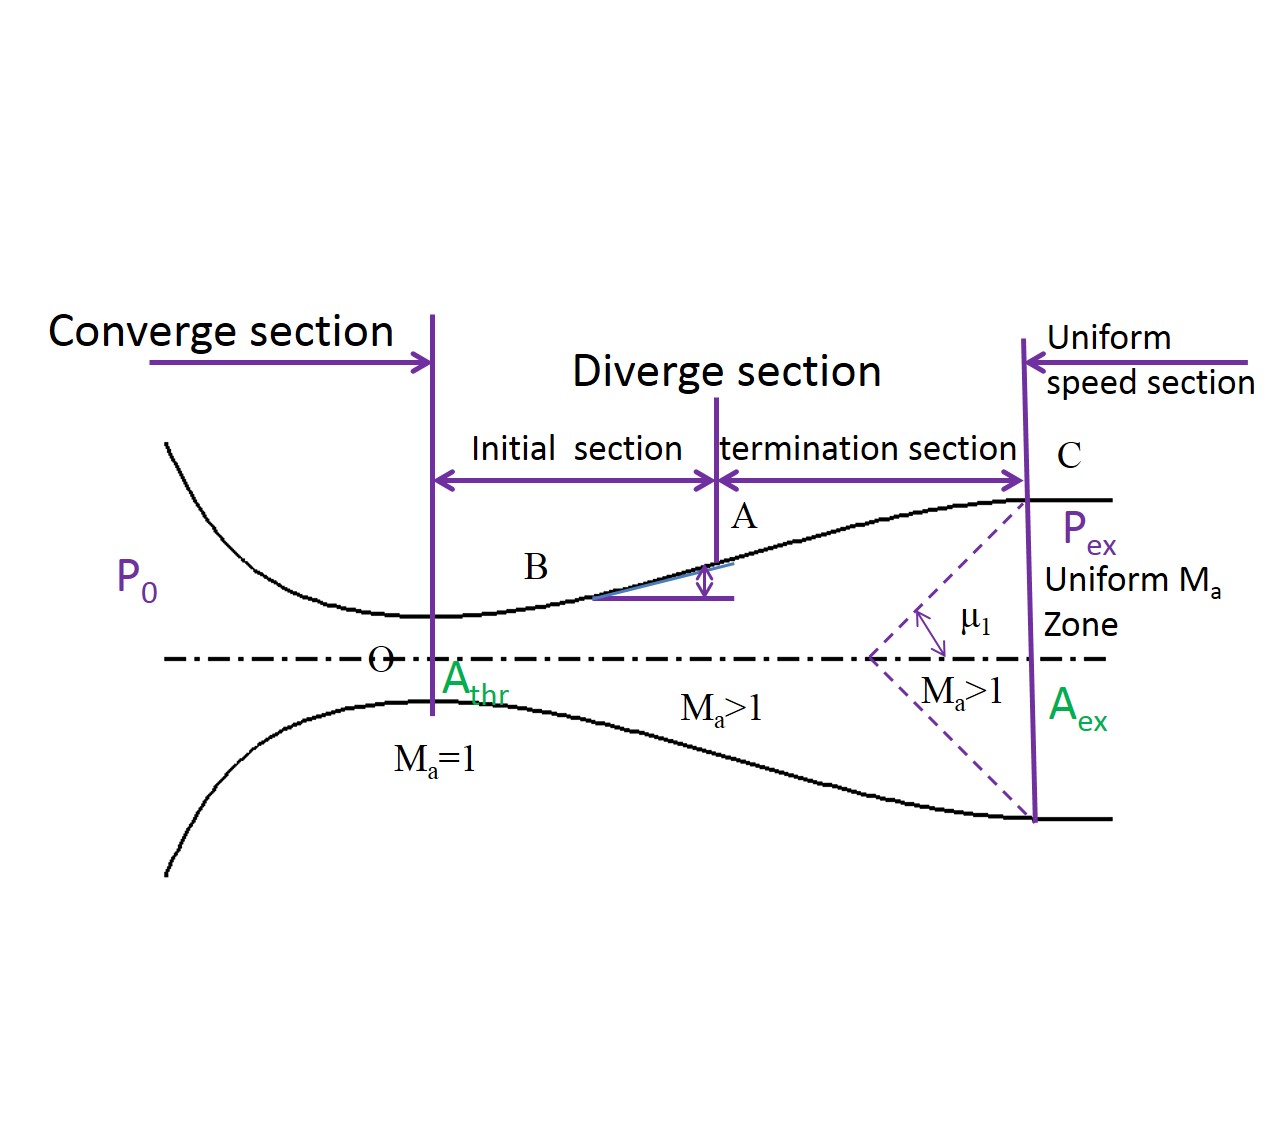


**Figure S1.** Schematic representation of the structure of the De Laval nozzle.

As shown in Figure S1, the De Laval nozzle is composed of converge section, diverge section which can be further divided into two parts (initial section and termination section). In order to achieve a high Mach number such as 3, the various parts of the De Laval nozzle should be carefully designed as follows.

**Design of converge section**

**
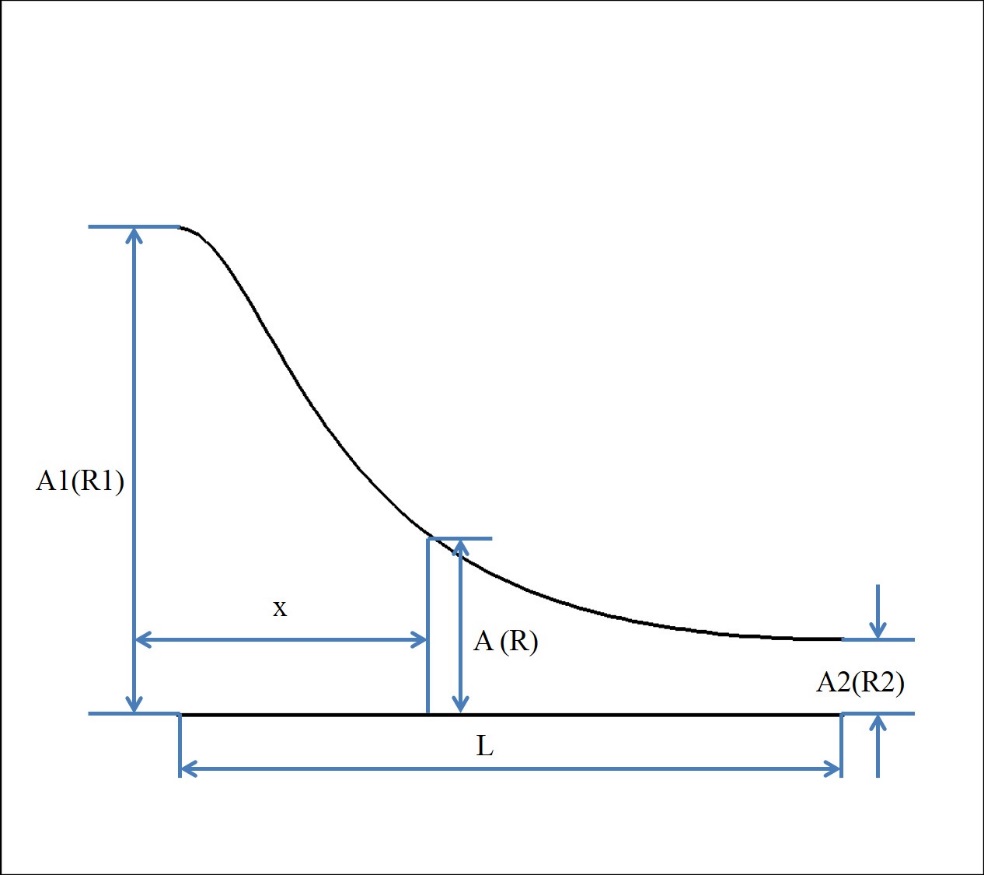
**

**Figure S2.** Schematic illustration of the converge section

The role of the converge section is to accelerate the gas flow to [reach](http://www.baidu.com/link?url=oUQjD96TQXA1ye-j5l4UA9I9y7QO6wZrBU0Sk04KTFMSWEBH-gq7vIrlvspjGk6mNw8X7sA9TwBLHRlRyVeFvcVk0IBHdT2Sw2VX0nqD3h_) acoustic speed at the throat of the De Laval nozzle (Ma=1). To obtain the curve of the converge section as depicted in Figure S2, we employ the вимощнский equation [S1], and the diameter of the De Laval nozzle (R) is given by

(S1)

where R1 and R2 are the diameters of entrance and throat, and x is the relative length of the De Laval nozzle.

Generally, the length of the converge section is kept in the range of 0.5~1 R1 [S2]. The gradient of the Match number (M) at the axis line can be expressed by

(S2)

λ=2 (1-M1) (S3)

where M1 is the Match number of the De Laval nozzle at the entrance.

According to solving equation S2 and S3, the M at the axis line can be written as

(S4)

When the cross areas of the De Laval nozzle at the entrance and throat (A1, A2) are introduced, we can obtain the value of M1 using equation 1. Then, the value of M is obtained at the axis line based on equation S4. Similarly, the corresponding cross area (A) can be given based on equation 1 as well. Therefore, the

**Design of diverge section**

As shown in Figure S1 and S3, the diverge section is consisting of initial section and terminal section, respectively.

*Initial section*

For the initial section, the formation of the gas stream is very important for the acceleration. Two boundary conditions are needed as follows [3]:

1. When x=0 (at the throat), y=y* (throat height), and dy/dx=0;

2. When x=xA (at the juncture), y=rA sinθA, dy/dx=tanθA, dy2/dx2 =0

(S5)

where , AA, A* (A*=Athr), and AT are corresponding sectional areas at different positions as shown in Figure S3, and h is the export radius [4].

*Terminal section*

The terminal section can be further divided into two zones (AQ and QU) as shown in Figure S3.


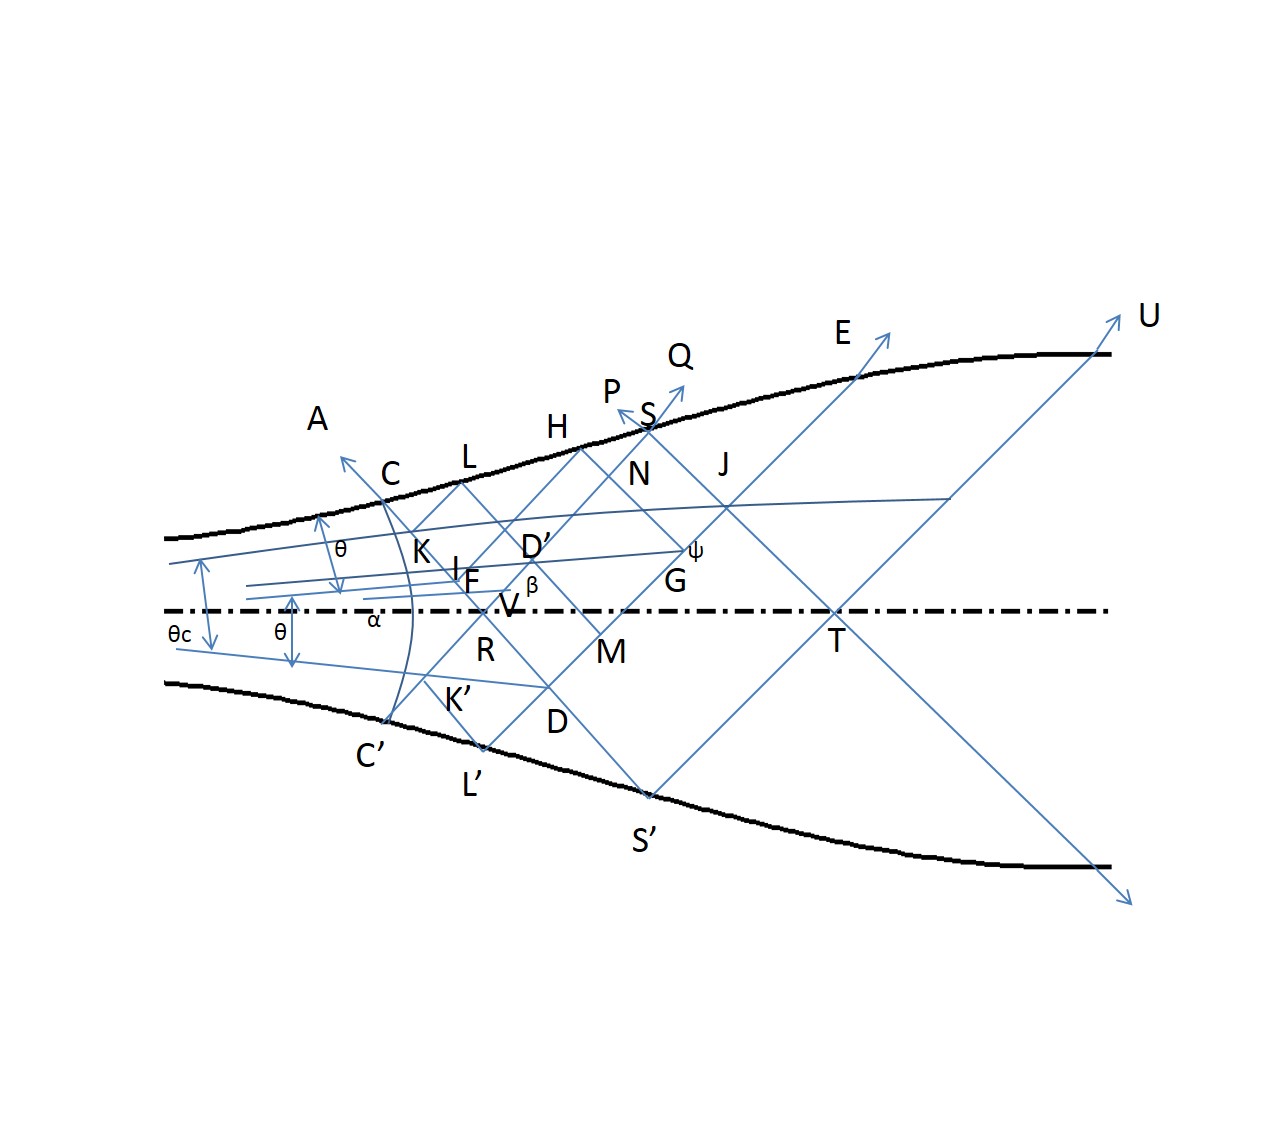


**Figure S3.** Schematic illustration of the terminal section.

For the AQ curve, the corresponding coordinates (x, y) are able to be calculated by the Characteristic line method [S5, S6], which are written as follows:.

Where M is the Match number, θA, θB, θD, and θk are characteristic angles at different positions, andare integral angle variables, and are angles of the Characteristic lines at G and V points.

Similarly, for the QU curve, the coordinates (x, y) that are identified by Characteristic line method are shown in the following equations [S8, S9]:

When these equations are solved under different conditions, we can obtain the physical shape and sizes of the De Laval nozzle.

[S1] Rgrow B M, Emanuel G, Comparison of Minimum Length Nozzle, Journal of Fluids Engineering, 1988.09.

[S2] Yu Y N, A summary of design techniques for Axisymmetric Hypersonic Wind Tunnels, AGARD ograph 35, Nov. 1958.

[S3] Korte J J, Inviscid Design of Hypersonic Wind Tunnel Nozzle for Real Gas, AIAA-2000-0677.

[S4] Sivells J C, Aerodynamic Design of Axisymmetric Hypersonic Wind Tunnels, Journal of Spacecraft, Vol.7, No. 11, pp. 1292-1299, 1970.

[S5] Streeter V L, Wylie E B, Fluid mechanics (International 9th Revised ed.), McGraw-Hill Higher Education, 1988.

[S6] Sarra S, The Method of Characteristics with applications to Conservation Laws, Journal of Online Mathematics and its Applications, 2003.

[S7] Evans L C, Partial Differential Equations, Providence: American Mathematical Society, ISBN 0-8218-0772-2, 1988.

[S8] John F, Partial differential equations (4th ed.), Springer, ISBN 978-0-387-90609-6, 1991.

[S9] Polyanin A D, Zaitsev V F, Moussiaux A, Handbook of First Order Partial Differential Equations, London: Taylor & Francis, ISBN 0-415-27267-X, 2002.
